# Supplementary material
Source: Springer Nature journal article supplement (https://www.springermedizin.de/resource/supplementary/13054_2011_9762_MOESM1_ESM.pdf/9706984)

**A**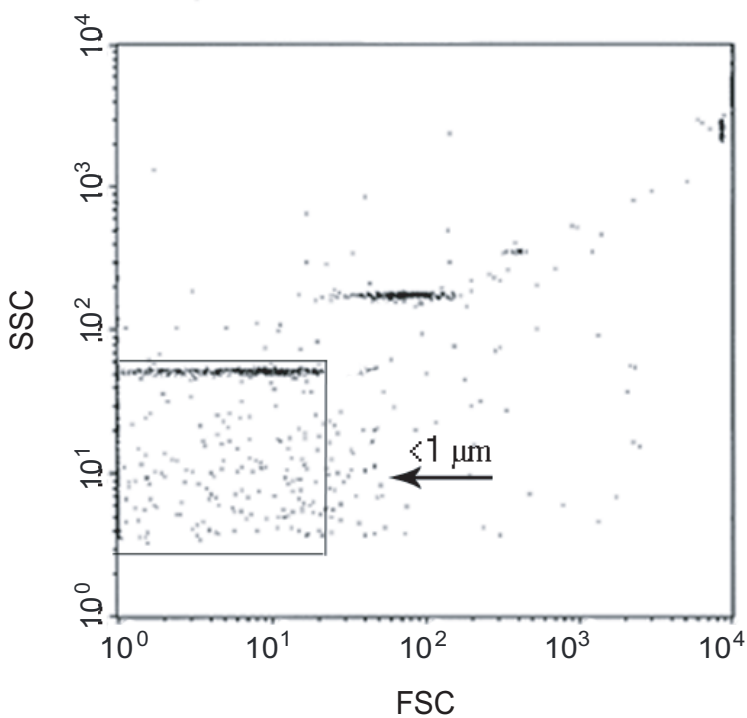**B**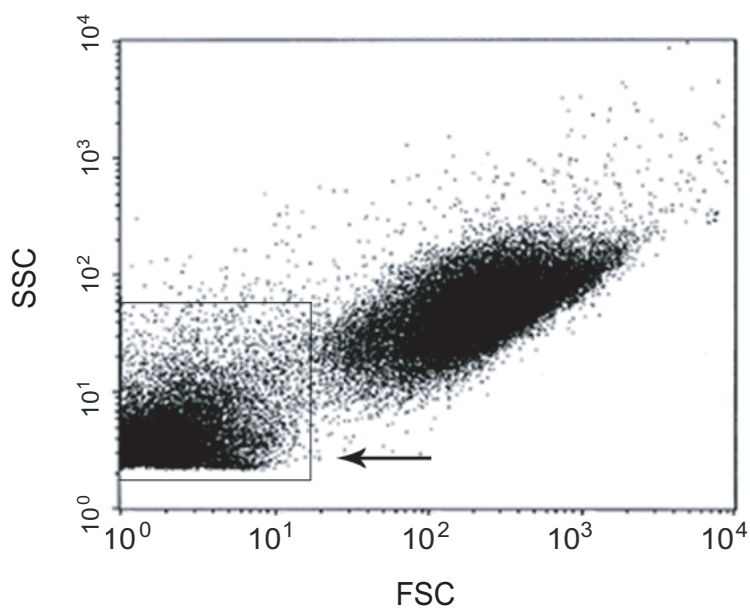**C**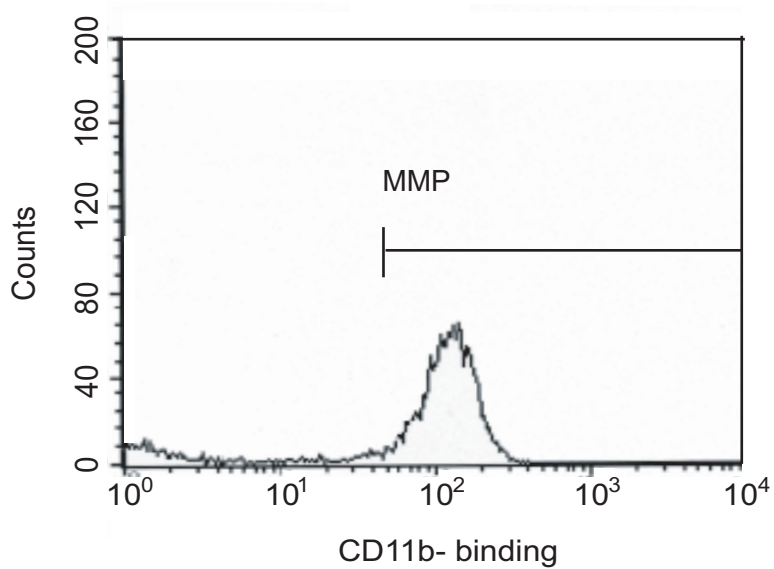

Supplement: MOESM1 [file 9706984]
